# Supplementary material for: Integrated Analysis of the Fecal Metagenome and Metabolome in Bladder Cancer in a Chinese Population
Source: MDPI journal article supplement (doi:10.3390/genes13111967), 2022-10-28

## *Supplementary Material*

# **Integrative Analysis of Fecal Metagenomics and Metabolomics in Bladder Cancer in a Chinese Population**

Chuan Qin, Zhenghao Chen, Rui Cao, Mingjun Shi and Ye Tian \*

Department of Urology, Beijing Friendship Hospital, Capital Medical University,  
Beijing 100068, China

\* Correspondence: youyitianye@126.com; Tel.: +86-010-63138377

**Table S1. List of top 35 microbiomes in terms of abundance.**

| <b>Genus</b>     | <b>Abundance trend</b> |
|------------------|------------------------|
| Parabacteroides  | Higher in EXP          |
| Butyricicoccus   | Higher in EXP          |
| Megamonas        | Higher in CON          |
| Prevotella       | Higher in CON          |
| Fusobacterium    | Higher in EXP          |
| Eubacterium      | Higher in CON          |
| Dialister        | Higher in CON          |
| Veillonella      | Higher in EXP          |
| Escherichia      | Higher in EXP          |
| Anaerostipes     | Higher in CON          |
| Streptococcus    | Higher in EXP          |
| Fusicatenibacter | Higher in CON          |

---

|                       |               |
|-----------------------|---------------|
| Bacteroides           | Higher in EXP |
| Oscillibacter         | Higher in CON |
| Lactobacillus         | Higher in CON |
| Roseburia             | Higher in CON |
| Megasphaera           | Higher in CON |
| Gemmiger              | Higher in CON |
| Ruminococcus          | Higher in EXP |
| Phascolarctobacterium | Higher in EXP |
| Sutterella            | Higher in CON |
| Romboutsia            | Higher in CON |
| Faecalibacterium      | Higher in CON |
| Bifidobacterium       | Higher in CON |
| Coprococcus           | Higher in CON |
| Paraprevotella        | Higher in EXP |
| Collinsella           | Higher in EXP |
| Clostridium           | Higher in CON |
| Lachnoclostridium     | Higher in EXP |
| Dorea                 | Higher in CON |
| Akkermansia           | Higher in EXP |
| Alistipes             | Higher in CON |

---

| Subdoligranulum              | Higher in CON   |
|------------------------------|-----------------|
| Bilophila                    | Higher in EXP   |
| Blautia                      | Higher in CON   |
| Species                      | Abundance trend |
| Bacteroides fragilis         | Higher in EXP   |
| Bacteroides thetaiotaomicron | Higher in EXP   |
| Roseburia faecis             | Higher in CON   |
| Roseburia inulinivorans      | Higher in CON   |
| Faecalibacterium prausnitzii | Higher in CON   |
| [Eubacterium] hallii         | Higher in CON   |
| Escherichia coli             | Higher in EXP   |
| Blautia wexlerae             | Higher in CON   |
| [Ruminococcus] torques       | Higher in CON   |
| [Eubacterium] rectale        | Higher in EXP   |
| Bifidobacterium adolescentis | Higher in CON   |
| Bacteroides vulgatus         | Higher in EXP   |
| uncultured Ruminococcus sp.  | Higher in CON   |
| Blautia obeum                | Higher in CON   |
| Clostridium sp. CAG:7        | Higher in EXP   |
| uncultured Clostridium sp.   | Higher in CON   |

---

|                                          |               |
|------------------------------------------|---------------|
| <i>Bifidobacterium longum</i>            | Higher in EXP |
| <i>Dialister succinatiphilus</i>         | Higher in CON |
| <i>Alistipes putredinis</i>              | Higher in CON |
| <i>Bacteroides stercoris</i>             | Higher in EXP |
| <i>Roseburia intestinalis</i>            | Higher in CON |
| <i>Prevotella copri</i> CAG:164          | Higher in CON |
| <i>Bacteroides ovatus</i>                | Higher in CON |
| <i>Fusicatenibacter saccharivorans</i>   | Higher in CON |
| <i>Akkermansia</i> sp. CAG:344           | Higher in EXP |
| <i>Dorea longicatena</i>                 | Higher in CON |
| <i>Ruminococcus callidus</i>             | Higher in EXP |
| <i>Bifidobacterium pseudocatenulatum</i> | Higher in CON |
| <i>Megamonas funiformis</i>              | Higher in CON |
| <i>Bacteroides plebeius</i>              | Higher in EXP |
| <i>Bacteroides dorei</i>                 | Higher in EXP |
| <i>Bacteroides coprocola</i>             | Higher in CON |
| <i>Bacteroides uniformis</i>             | Higher in EXP |
| <i>Prevotella copri</i>                  | Higher in CON |
| <i>Eubacterium</i> sp. CAG:38            | Higher in EXP |

---

BLCA patients, EXP group; healthy individuals, CON group.

**Table S2. List of functional characterization of gut microbiota.**

| <b>KEGG pathway</b>                                              | <b>EXP relative abundance</b> | <b>CON relative abundance</b> |
|------------------------------------------------------------------|-------------------------------|-------------------------------|
| Organismal Systems; Immune system                                | 0.000928                      | 0.000973                      |
| Genetic Information Processing; Folding, sorting and degradation | 0.008625                      | 0.008780                      |
| Human Diseases; Cancers: Overview                                | 0.002075                      | 0.002042                      |
| Organismal Systems; Nervous system                               | 0.000725                      | 0.000660                      |
| Metabolism; Lipid metabolism                                     | 0.009825                      | 0.009856                      |
| Human Diseases; Endocrine and metabolic diseases                 | 0.001326                      | 0.001403                      |
| Metabolism; Nucleotide metabolism                                | 0.017829                      | 0.018526                      |
| Human Diseases; Cardiovascular diseases                          | 0.001040                      | 0.001101                      |
| Cellular Processes; Cellular community - prokaryotes             | 0.011554                      | 0.011921                      |
| Genetic Information Processing; Replication and repair           | 0.011273                      | 0.011770                      |
| Cellular Processes; Transport and catabolism                     | 0.002157                      | 0.001922                      |
| Genetic Information Processing; Translation                      | 0.019353                      | 0.020376                      |
| Organismal Systems; Environmental adaptation                     | 0.000752                      | 0.000733                      |

---

|                                                              |          |          |
|--------------------------------------------------------------|----------|----------|
| Metabolism; Energy metabolism                                | 0.019885 | 0.020447 |
| Cellular Processes; Cell motility                            | 0.002126 | 0.002373 |
| Organismal Systems; Aging                                    | 0.001272 | 0.001327 |
| Genetic Information Processing;<br>Transcription             | 0.001031 | 0.001072 |
| Metabolism; Metabolism of<br>cofactors and vitamins          | 0.023138 | 0.023457 |
| Environmental Information<br>Processing; Signal transduction | 0.009662 | 0.009675 |
| Human Diseases;<br>Neurodegenerative diseases                | 0.000403 | 0.000365 |
| Metabolism; Glycan biosynthesis<br>and metabolism            | 0.010453 | 0.010184 |
| Metabolism; Carbohydrate<br>metabolism                       | 0.039645 | 0.040542 |
| Organismal Systems; Digestive<br>system                      | 0.000498 | 0.000501 |
| Human Diseases; Drug resistance:<br>Antineoplastic           | 0.001292 | 0.001315 |
| Human Diseases; Infectious<br>diseases: Viral                | 0.000324 | 0.000320 |
| Human Diseases; Drug resistance:<br>Antimicrobial            | 0.005727 | 0.005662 |
| Metabolism; Biosynthesis of other<br>secondary metabolites   | 0.007913 | 0.007904 |
| Metabolism; Metabolism of<br>terpenoids and polyketides      | 0.005170 | 0.005238 |

---

| Metabolism; Metabolism of other amino acids                          | 0.008116                      | 0.008037                      |
|----------------------------------------------------------------------|-------------------------------|-------------------------------|
| Metabolism; Amino acid metabolism                                    | 0.030106                      | 0.030568                      |
| Environmental Information Processing; Membrane transport             | 0.020228                      | 0.021590                      |
| Human Diseases; Infectious diseases: Bacterial                       | 0.002343                      | 0.002357                      |
| Metabolism; Xenobiotics biodegradation and metabolism                | 0.003032                      | 0.003175                      |
| Cellular Processes; Cell growth and death                            | 0.004911                      | 0.005015                      |
| Organismal Systems; Endocrine system                                 | 0.002282                      | 0.002359                      |
| <b>eggNOG pathway</b>                                                | <b>EXP relative abundance</b> | <b>CON relative abundance</b> |
| Resolvase                                                            | 0.002667                      | 0.003035                      |
| Transporter                                                          | 0.002213                      | 0.002163                      |
| Integrase                                                            | 0.002746                      | 0.002642                      |
| Binding-protein-dependent transport systems inner membrane component | 0.002713                      | 0.003045                      |
| transposase                                                          | 0.007272                      | 0.007228                      |
| oxidoreductase                                                       | 0.001693                      | 0.001642                      |
| peptidase_                                                           | 0.002346                      | 0.002177                      |
| Transposase                                                          | 0.005297                      | 0.006012                      |
| Glycosyl transferase (Group 1                                        | 0.001749                      | 0.001475                      |

---

|                                            |          |          |
|--------------------------------------------|----------|----------|
| ABC transporter (permease)                 | 0.002362 | 0.002386 |
| hydrolase family 43                        | 0.001865 | 0.001684 |
| radical SAM domain protein                 | 0.002406 | 0.002516 |
| Dehydrogenase                              | 0.002745 | 0.002809 |
| Hydrolase                                  | 0.002459 | 0.002451 |
| helicase                                   | 0.002353 | 0.002495 |
| AAA-ATPase                                 | 0.001627 | 0.001732 |
| Ragb susd domain-containing protein        | 0.002919 | 0.002354 |
| Transcriptional Regulator AraC Family      | 0.001952 | 0.001959 |
| Glycosyl transferase, family 2             | 0.003903 | 0.003640 |
| domain protein                             | 0.005284 | 0.005281 |
| membrane                                   | 0.001948 | 0.002067 |
| Histidine kinase                           | 0.011125 | 0.010771 |
| Efflux transporter rnd family, mfp subunit | 0.001896 | 0.001526 |
| Membrane                                   | 0.007120 | 0.006665 |
| acetyltransferase                          | 0.003057 | 0.002800 |
| hydrolase family 2                         | 0.002524 | 0.002198 |
| regulatoR                                  | 0.003367 | 0.003686 |
| Methyltransferase                          | 0.002679 | 0.002712 |

---



| RNA Polymerase                                                              | 0.002477               | 0.002141               |
|-----------------------------------------------------------------------------|------------------------|------------------------|
| ATPase (AAA                                                                 | 0.001599               | 0.001866               |
| hydrolase family 3                                                          | 0.001669               | 0.001634               |
| TonB dependent receptor                                                     | 0.004881               | 0.003875               |
| Mate efflux family protein                                                  | 0.003663               | 0.003927               |
| tonB-dependent Receptor                                                     | 0.001983               | 0.001705               |
| Transcriptional regulator                                                   | 0.011444               | 0.012176               |
| CAZy pathway                                                                | EXP relative abundance | CON relative abundance |
| amylase (EC 3.2.1.33)                                                       | 0.001253               | 0.001430               |
| dTDP-L-Rha: N-acetylglucosaminyl-PP-decaprenol &alpha_-1,3-L-rhamnosyl(...) | 0.002248               | 0.002122               |
| branching enzyme (EC 2.4.1.18)                                              | 0.001253               | 0.001424               |
| pullulanase (EC 3.2.1.41)                                                   | 0.001150               | 0.001337               |
| sucrose phosphorylase (EC 2.4.1.7)                                          | 0.001150               | 0.001337               |
| chitin oligosaccharide synthase (EC 2.4.1.-)                                | 0.002248               | 0.002122               |
| N-acetylgalactosaminyltransferase (EC 2.4.1.-)                              | 0.002248               | 0.002122               |
| hyaluronan synthase (EC 2.4.1.212)                                          | 0.002248               | 0.002122               |
| UDP-Galf: galactofuranosyl-galactofuranosyl-rhamnosyl-N-acetylglucosam      | 0.002248               | 0.002122               |

Supplementary Material

|                                                                             |          |          |
|-----------------------------------------------------------------------------|----------|----------|
| dolichyl-phosphate &beta;-glucosyltransferase (EC 2.4.1.117)                | 0.002248 | 0.002122 |
| lysozyme (EC 3.2.1.17)                                                      | 0.001510 | 0.001401 |
| exo-&beta;-glucosaminidase (EC 3.2.1.165)                                   | 0.002537 | 0.002171 |
| [inverting] exo-&alpha;-1,5-L-arabinanase (EC 3.2.1.-)                      | 0.002385 | 0.002072 |
| exo-1,3-1,4-glucanase (EC 3.2.1.-)                                          | 0.001401 | 0.001367 |
| coniferin &beta;-glucosidase (EC 3.2.1.126)                                 | 0.001401 | 0.001367 |
| dolichyl-phosphate &beta;-D-mannosyltransferase (EC 2.4.1.83)               | 0.002248 | 0.002122 |
| isoprimeverose-producing oligoxyloglucan hydrolase (EC 3.2.1.120)           | 0.001401 | 0.001367 |
| arabinanase (EC 3.2.1.99)                                                   | 0.002385 | 0.002072 |
| xylan 1,4-&beta;-xylosidase (EC 3.2.1.37)                                   | 0.001401 | 0.001367 |
| exo-&alpha;-1,5-L-arabinofuranosidase (EC 3.2.1.-)                          | 0.002385 | 0.002072 |
| cellulose synthase (EC 2.4.1.12)                                            | 0.002248 | 0.002122 |
| UDP-Galf: rhamnopyranosyl-N-acetylglucosaminyl-PP-decaprenol &beta;-1,(...) | 0.002248 | 0.002122 |
| xylanase (EC 3.2.1.8)                                                       | 0.002477 | 0.002139 |
| glucan 1,3-&beta;-glucosidase (EC 3.2.1.58)                                 | 0.001404 | 0.001369 |

|                                                             |          |          |
|-------------------------------------------------------------|----------|----------|
| N-acetylglucosaminyltransferase (EC 2.4.1.-)                | 0.002248 | 0.002122 |
| neopullulanase (EC 3.2.1.135)                               | 0.001150 | 0.001337 |
| glucodextranase (EC 3.2.1.70)                               | 0.001178 | 0.001356 |
| acetyl xylan esterase (EC 3.1.1.72)                         | 0.001510 | 0.001535 |
| 4-&alpha;-glucanotransferase (EC 2.4.1.25)                  | 0.001253 | 0.001424 |
| chitin synthase (EC 2.4.1.16)                               | 0.002248 | 0.002122 |
| galactan 1,3-&beta;-galactosidase (EC 3.2.1.145)            | 0.002385 | 0.002072 |
| maltotriose-forming &alpha;-amylase (EC 3.2.1.116)          | 0.001150 | 0.001337 |
| cyclomaltodextrinase (EC 3.2.1.54)                          | 0.001253 | 0.001424 |
| mannosylglycoprotein endo-&beta;-mannosidase (EC 3.2.1.152) | 0.002151 | 0.001884 |
| glucan 1,4-&beta;-glucosidase (EC 3.2.1.74)                 | 0.001401 | 0.001367 |

---

BLCA patients, EXP group; healthy individuals, CON group.

**Table S3. The KEGG pathway annotation results**

| Map Name                                | Map ID   | P value | FDR   | RichFactor |
|-----------------------------------------|----------|---------|-------|------------|
| Biosynthesis of unsaturated fatty acids | hsa01040 | 0.006   | 0.031 | 0.027      |
| Linoleic acid metabolism                | hsa00591 | 0.046   | 0.115 | 0.036      |

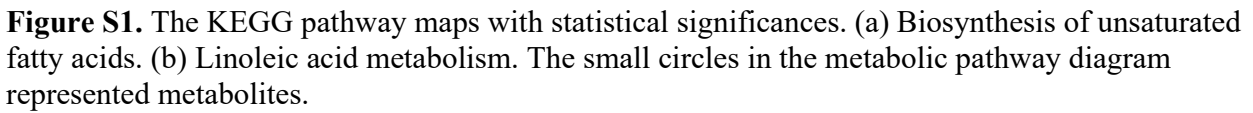

Supplement: s1 [file s1]
